# Supplementary material for: ZnAlF5·[TAZ]: an Al fluorinated MOF of MIL-53(Al) topology with cationic {Zn(1,2,4 triazole)}2+ linkers
Source: Royal Society of Chemistry journal article supplement (doi:10.1039/c0jm03559a), 2011-01-01
Supplement: c0jm03559a.pdf [file c0jm03559a.pdf]

# **ZnAlF<sub>5</sub>·[TAZ]: an Al fluorinated MOF of MIL-53(Al) topology with cationic {Zn(1,2,4 triazole)}<sup>2+</sup> linkers.**

*Amandine Cadiou, Charlotte Martineau, Marc Leblanc, Vincent Maisonneuve, Annie Hémon-Ribaud, Francis Taulelle, Karim Adil*

## **Electronic Supplementary Information**

### **Experimental.**

**1. Synthesis.** ZnAlF<sub>5</sub>·[TAZ] has been synthesized from a stoichiometric mixture of ZnO (Merk), Al(OH)<sub>3</sub> (Merk), 1,2,4 triazole (Aldrich), hydrofluoric acid solution (40% HF, Prolabo) and water. The hydrothermal reaction has been performed at 160°C in a microwave oven (CEM Mars) for 1 h and the obtained solid powder has been washed with water and dried at room temperature.

**2. X-ray diffraction.** The powder X-ray diffraction pattern of ZnAlF<sub>5</sub>·[TAZ] has been recorded at room temperature under air in a Bragg-Brentano geometry with a PANalytical MPD-PRO diffractometer using a CuK<sub>α</sub> radiation in the 4 – 99° 2θ range and a 0.017° interpolated step.

**3. NMR experiments.** The <sup>1</sup>H, <sup>13</sup>C <sup>19</sup>F and <sup>27</sup>Al (respective Larmor frequencies of 500.1, 125.76, 470.6 and 130.3 MHz) MAS NMR spectra of ZnAlF<sub>5</sub>·[TAZ] were collected on an Avance 500 Bruker spectrometer (B<sub>0</sub> = 11.7 T) using 2.5 or 3.2 mm CP-MAS probes. The <sup>19</sup>F magic angle spinning (MAS) Hahn—echo spectrum of ZnAlF<sub>5</sub>·[TAZ] was recorded at spinning frequency of 30 kHz, using 3.0 μs 90° pulses, an inter—pulse delay synchronized

with the rotor frequency and recycle delays of 20 s. The 2D  $^{19}\text{F}$  double-quantum single-quantum (DQ—SQ) MAS correlation spectrum was recorded at a 30 kHz spinning frequency using the variant of the back—to—back (BABA)<sup>i</sup> pulse sequence spanning on multiple of two rotor periods to excite and reconvert the double—quantum coherences.  $3.0\ \mu\text{s}$   $90^\circ$  pulses and excitation—reconversion delays of  $66.67\ \mu\text{s}$  (corresponding to two rotor periods) were used. 50 rotor—synchronized  $t_1$  increments were accumulated with 16 transients each. Phase sensitive detection in the indirect dimension was obtained using the States method.<sup>ii</sup> The  $^1\text{H}$  MAS (25 kHz) Hahn—echo spectrum of  $\text{ZnAlF}_5\cdot[\text{Taz}]$  was recorded using  $2.5\ \mu\text{s}$   $90^\circ$  pulses, an inter—pulse delay synchronized with the rotor frequency and recycle delays of 5 s. The 2D  $^1\text{H}$  DQ—SQ MAS (25 kHz) NMR correlation spectrum of  $\text{ZnAlF}_5\cdot[\text{Taz}]$  was recorded using the BABA recoupling scheme using  $2.5\ \mu\text{s}$   $90^\circ$  pulses and excitation—reconversion delays of  $80\ \mu\text{s}$ . 32 rotor—synchronized  $t_1$  increments were accumulated with 32 transients each. Phase sensitive detection in the indirect dimension was obtained using the States method. The  $^{27}\text{Al}$  one pulse MAS (30 kHz) NMR spectrum was recorded using a  $2.5\ \mu\text{s}$  pulse length, 8192 transients and 1 s recycle delay. The  $^{13}\text{C}$  CP-MAS (8 kHz) NMR spectrum of  $\text{ZnAlF}_5\cdot[\text{Taz}]$  was recorded using a 2 ms contact time, a  $^1\text{H}$  64-step small-phase incremental alternation (SPINAL-64)<sup>iii</sup> decoupling scheme (with an RF field corresponding to a 90 kHz nutation frequency) during the acquisition period and a 10 s recycle delay. The  $^1\text{H}$ ,  $^{13}\text{C}$   $^{19}\text{F}$  and  $^{27}\text{Al}$  chemical shifts were referenced to TMS,  $\text{CFCl}_3$ , and a 1 M solution of  $\text{Al}(\text{NO}_3)_3$ , respectively. All NMR spectra were reconstructed and drawn using the DMFIT software.<sup>iv</sup>

**4. *Ab initio* calculations.** All calculations were conducted within the Kohn-Sham<sup>v</sup> density functional theory (DFT) using the NMR CASTEP<sup>vi,vii</sup> program in the Materials Studio 5.0 environment. For the structure optimization of  $\text{ZnAlF}_5\cdot[\text{Taz}]$ , ultrasoft pseudopotentials were employed, with a plane-wave cut-off energy of 400 eV and a  $2 \times 2 \times 2$  Monkhorst-Pack<sup>viii</sup>  $k$ -point sampling grid. During the structure optimization, the cell parameters were set to that of

ZnAlF<sub>5</sub>·[TAZ] as determined by XRPD and were kept constant. The Perdew, Burke and Ernzerhof (PBE)<sup>ix</sup> functionals were used in the generalized gradient approximation (GGA) for the exchange correlation energy. Magnetic properties were computed using the projector-augmented wave method (GIPAW)<sup>x</sup> method. For the calculation of the <sup>27</sup>Al electric field gradient (EFG) tensor parameters, a 2 x 2 x 2 Monkhorst-Pack *k*-point grid was used to sample the Brillouin zone, with a plane-wave basis set expanded to kinetics energy lower than 500 eV. For the calculation of the <sup>19</sup>F, <sup>13</sup>C and <sup>1</sup>H shielding tensor components, a 2 x 2 x 3 Monkhorst-Pack *k*-point grid was used to sample the Brillouin zone, with a plane-wave basis set expanded to kinetics energy lower than 500 eV.

**Figure 1.** Final profile refinement of  $\text{ZnAlF}_5 \cdot [\text{Taz}]$ : observed (line), calculated (point), and difference (bottom) profiles of the XRPD pattern.

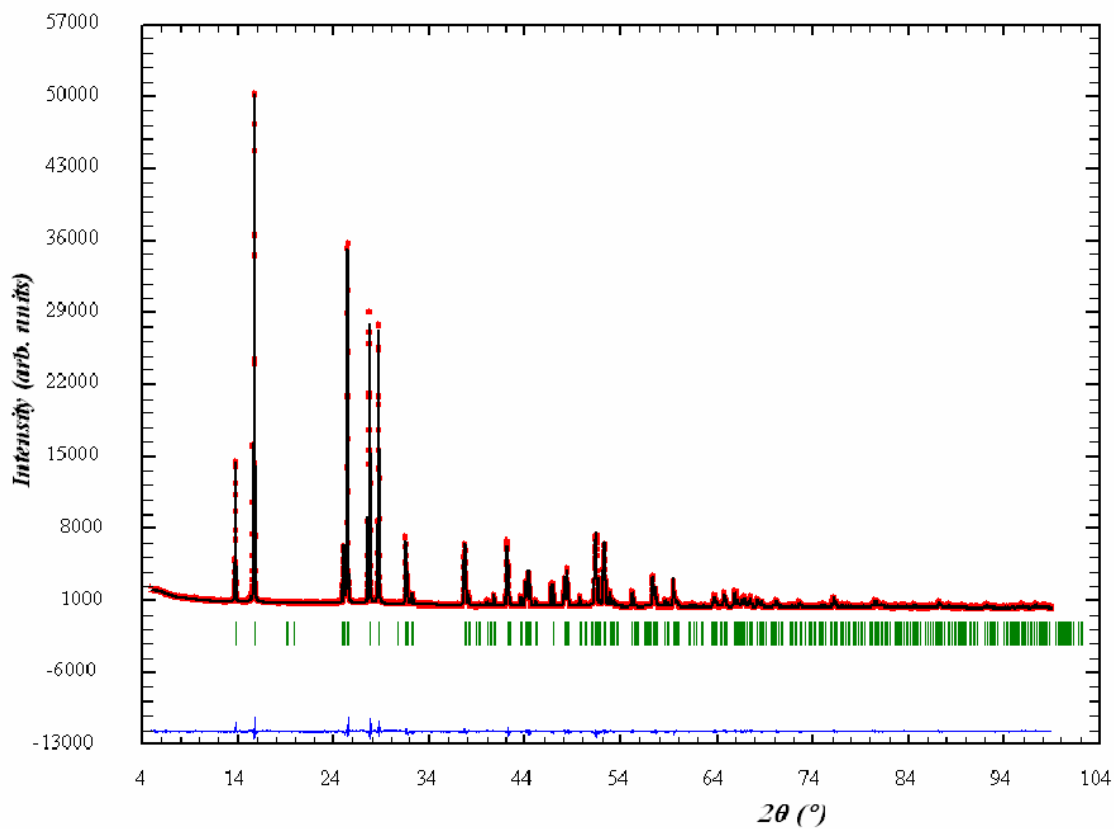

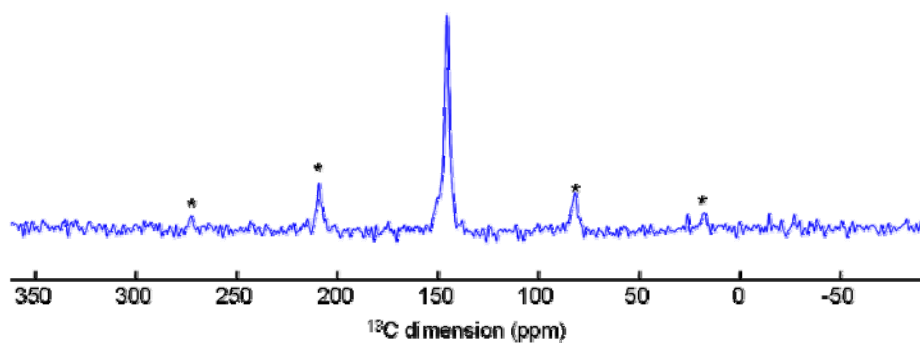

**Figure 2.**  $^{13}\text{C}$  CP-MAS NMR Spectrum of  $\text{ZnAlF}_5\cdot[\text{TAZ}]$ . The spinning sidebands are marked by \*.

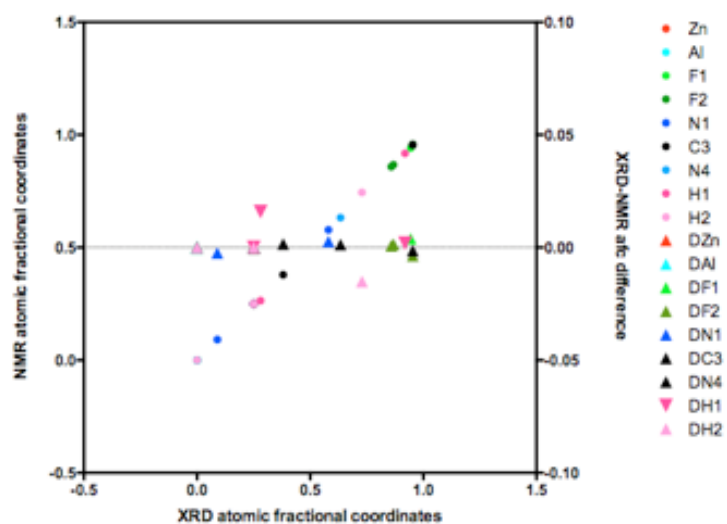

**Figure 3.** XPRD vs NMR atomic fractional coordinates (AFC) and XPRD AFC vs AFC difference in  $\text{ZnAlF}_5\cdot[\text{TAZ}]$ .

**Table 1.** Conditions of X-ray data collection and refinement parameters of ZnAlF<sub>5</sub>·[TAZ].

|                                                                    |                                                                 |
|--------------------------------------------------------------------|-----------------------------------------------------------------|
|                                                                    | ZnAlF <sub>5</sub> ·[TAZ]                                       |
| Formula                                                            | ZnAlF <sub>5</sub> C <sub>2</sub> N <sub>3</sub> H <sub>3</sub> |
| Formula weight                                                     | 256.43                                                          |
| Crystal system                                                     | Orthorhombic                                                    |
| Space group                                                        | Imma                                                            |
| a (Å)                                                              | 8.9288(1)                                                       |
| b (Å)                                                              | 7.0989(1)                                                       |
| c (Å)                                                              | 9.2593(1)                                                       |
| V (Å <sup>3</sup> ), Z                                             | 586.9(1), 4                                                     |
| Wavelength (Å)                                                     | 1.54056                                                         |
| 2θ range (°)                                                       | 4-99                                                            |
| N. of independent reflections                                      | 379                                                             |
| N. intensity-dependent parameters                                  | 44                                                              |
| R <sub>P</sub> , R <sub>wp</sub> , R <sub>B</sub> , R <sub>F</sub> | 0.077, 0.081, 0.031, 0.043                                      |

**Table 2.** Fractional atomic coordinates of ZnAlF<sub>5</sub>·[TAZ] obtained from Rietveld refinement and from DFT optimization (in italic).

|      | x             | y             | z             | Biso (Å <sup>2</sup> ) |
|------|---------------|---------------|---------------|------------------------|
| Zn   | ¼             | ¼             | ¼             | 2.47(2)                |
|      | <i>¼</i>      | <i>¼</i>      | <i>¼</i>      |                        |
| Al   | 0             | 0             | 0             | 2.22(9)                |
|      | <i>0</i>      | <i>0</i>      | <i>0</i>      |                        |
| F(1) | 0             | ¼             | 0.9447(3)     | 2.07(9)                |
|      | <i>0</i>      | <i>¼</i>      | <i>0.9408</i> |                        |
| F(2) | 0.8587(2)     | 0.9539(2)     | 0.8685(2)     | 2.48(5)                |
|      | <i>0.8579</i> | <i>0.9575</i> | <i>0.8671</i> |                        |
| N(1) | 0.5808(3)     | ¼             | 0.0894(4)     | 2.08(9)                |
|      | <i>0.5781</i> | <i>¼</i>      | <i>0.0918</i> |                        |
| C(3) | 0.3804(6)     | ¼             | 0.9535(5)     | 3.6(2)                 |
|      | <i>0.3788</i> | <i>¼</i>      | <i>0.9549</i> |                        |
| N(4) | 0             | ¼             | 0.6338(6)     | 2.7(4)                 |
|      | <i>0</i>      | <i>¼</i>      | <i>0.6325</i> |                        |
| H(1) | 0.2803        | ¼             | 0.9193        | 15(1)                  |
|      | <i>0.2644</i> | <i>¼</i>      | <i>0.9174</i> |                        |
| H(2) | 0             | ¼             | 0.7289        | 15(1)                  |
|      | <i>0</i>      | <i>¼</i>      | <i>0.7440</i> |                        |

# File 1. Instructions and results files from the cell determination using the McMaille software.

```
McMaille input parameters:
! Wavelength, zeropoint, Ngrid
 1.540598  0.0000 0
! Codes for symmetry
 1 1 1 1 0 0
! W, Nind
0.200  0
!Pmin, Pmax, Vmin, Vmax, Rmin, Rmax, Rmaxref
 2. 20. 8. 1000. 0.05 0.15 0.50
! Ntests, Nruns
-100 20
! 2-theta      Intensity
 13.77965      14523.27
 15.73154      50162.91
 25.08183      6186.574
 25.44973      35930.96
 27.74953      28938.02
 28.72030      27508.07
 31.59583      7021.501
 37.60630      5260.167
 37.71967      6538.038
 40.83050      1066.698
 42.14981      6763.961
 44.13326      2758.817
 44.39032      3665.281
 46.82245      2581.186
 48.12358      3087.138
 48.43833      4143.285
 51.34167      7156.181
 51.45929      7268.446
 52.15933      5335.458
 52.25543      6552.193
 52.85062      1946.799
 55.19131      1955.880
 57.29116      3398.314
 59.45080      2872.215
 63.76271      1557.828
 65.94198      1963.232
```

```
=====
McMaille version 4.00      by A. Le Bail - 2006 - alb@crystal.org
=====
```

Using generic filename : camw28o2long-new

Number of Processors : 1

30-Mar-2010 10 hour 12 min 11 Sec

McMaille input parameters:

Wavelength : 1.54060 Zeropoint : 0.0000

```
=====
Monte Carlo cell generation
=====
```

Width of the columnar profile shape, W = 0.2000

Max non-indexed reflections, NIND = 0

Min/Max Rp, Rmaxref 5.0000001E-02 0.1500000 0.5000000

N of runs 20  
N of MC events in cubic 100.000000000000  
N of MC events in tetra/hexa 2000.000000000000  
N of MC events in orthorhombic 40000.000000000000  
N of MC events in monoclinic 800000.000000000000  
N of MC events in triclinic 16000000.000000000000

2-THETA d(A) Iobs W

|        |        |           |       |
|--------|--------|-----------|-------|
| 13.780 | 6.4213 | 14523.270 | 0.200 |
| 15.732 | 5.6287 | 50162.910 | 0.200 |
| 25.082 | 3.5475 | 6186.574  | 0.200 |
| 25.450 | 3.4971 | 35930.961 | 0.200 |
| 27.750 | 3.2122 | 28938.020 | 0.200 |
| 28.720 | 3.1058 | 27508.070 | 0.200 |
| 31.596 | 2.8294 | 7021.501  | 0.200 |
| 37.606 | 2.3899 | 5260.167  | 0.200 |
| 37.720 | 2.3830 | 6538.038  | 0.200 |
| 40.831 | 2.2083 | 1066.698  | 0.200 |
| 42.150 | 2.1422 | 6763.961  | 0.200 |
| 44.133 | 2.0504 | 2758.817  | 0.200 |
| 44.390 | 2.0391 | 3665.281  | 0.200 |
| 46.822 | 1.9387 | 2581.186  | 0.200 |
| 48.124 | 1.8893 | 3087.138  | 0.200 |
| 48.438 | 1.8777 | 4143.285  | 0.200 |
| 51.342 | 1.7782 | 7156.181  | 0.200 |
| 51.459 | 1.7744 | 7268.446  | 0.200 |
| 52.159 | 1.7522 | 5335.458  | 0.200 |
| 52.255 | 1.7492 | 6552.193  | 0.200 |
| 52.851 | 1.7309 | 1946.799  | 0.200 |
| 55.191 | 1.6629 | 1955.880  | 0.200 |
| 57.291 | 1.6068 | 3398.314  | 0.200 |
| 59.451 | 1.5535 | 2872.215  | 0.200 |
| 63.763 | 1.4585 | 1557.828  | 0.200 |
| 65.942 | 1.4154 | 1963.232  | 0.200 |

dmax = 6.421270  
 Be sure that your choice of max cell parameters ensures the exploration of all possibilities.

Dmin = 1.395433

30-Mar-2010 10 hour 12 min 11 Sec

=====

RESULTS - RESULTS - RESULTS - RESULTS

=====

EXPLORED CELL PARAMETERS AND VOLUMES:

=====

Cubic Monte Carlo search :  
 Max a, V 20.00000 1000.000

Hexagonal/Trigonal/Rhomboedral Monte Carlo search :  
 Max(a,c), V 20.00000 20.00000 1000.000

Tetragonal Monte Carlo search :  
 Max(a,c), V 20.00000 20.00000 1000.000

Orthorhombic Monte Carlo search :  
 Max(a,b,c), V 20.00000 20.00000 20.00000 1000.000

=====

FINAL LIST OF CELL PROPOSALS, sorted by McM20 :

=====

Global list as produced in the .ckm file  
 (IN=number of indexed lines)  
 The correct cell has some chances to be just below

| IN  | F.o.M. | Volume  | V/V1 | a      | b      | c      | alpha  | beta   | gamma  | Bravais lattice |
|-----|--------|---------|------|--------|--------|--------|--------|--------|--------|-----------------|
| 26  | 30.10  | 586.283 | 1.00 | 7.0958 | 9.2595 | 8.9231 | 90.000 | 90.000 | 90.000 | P Ortho         |
| *** |        |         |      |        |        |        |        |        |        |                 |

=====

FINAL LIST OF CELL PROPOSALS, sorted by F(20) :



=====

Global list (IN=number of indexed lines)  
The correct cell has some chances to be just below

| IN | F(20) | Volume  | V/V1 | a      | b      | c      | alpha  | beta   | gamma  | Bravais lattice |
|----|-------|---------|------|--------|--------|--------|--------|--------|--------|-----------------|
| 26 | 48.74 | 586.283 | 1.00 | 7.0958 | 9.2595 | 8.9231 | 90.000 | 90.000 | 90.000 | P Ortho         |

\*\*\*

=====

FINAL LIST OF CELL PROPOSALS, sorted by M(20) :

=====

Global list (IN=number of indexed lines)  
The correct cell has some chances to be just below

| IN | M(20) | Volume  | V/V1 | a      | b      | c      | alpha  | beta   | gamma  | Bravais lattice |
|----|-------|---------|------|--------|--------|--------|--------|--------|--------|-----------------|
| 26 | 40.40 | 586.283 | 1.00 | 7.0958 | 9.2595 | 8.9231 | 90.000 | 90.000 | 90.000 | P Ortho         |

\*\*\*

=====

See for the highest F.o.M. above the cell(s) with highest symmetry, if any (Cubic, hexagonal, etc), they could correspond to the the right solution

=====

Cells sorted by symmetry

| Rp    | Vol     | Vol/V1 | Ind | Nsol | a      | b      | c      | alpha  | beta   | gamma  |
|-------|---------|--------|-----|------|--------|--------|--------|--------|--------|--------|
| 0.073 | 586.283 | 1.00   | 26  | 1    | 7.0958 | 9.2595 | 8.9231 | 90.000 | 90.000 | 90.000 |

"Best" cell with largest McM20 :

-----

PROGRAM \*\*\* CELREF \*\*\* (J.LAUGIER & A.FILHOL 10/78)

OBSERVABLE NUMBER : 25  
ITERATION NUMBER : 10  
REFINEMENT CONSTRAINTS : NO  
INITIAL VALUES :

| ZERO              | LAMBDA  | A       | B       | C      | ALPHA  | BETA   | GAMMA  |
|-------------------|---------|---------|---------|--------|--------|--------|--------|
| 1.                | 0.      | 1.      | 1.      | 1.     | 0.     | 0.     | 0.     |
| 0.000             | 1.5406  | 7.0958  | 9.2595  | 8.9231 | 90.000 | 90.000 | 90.000 |
| RECIPROCAL CELL : | 0.14093 | 0.10800 | 0.11207 | 90.000 | 90.000 | 90.000 | 90.000 |
| VOLUME (A**3) :   | 586.283 |         |         |        |        |        |        |

NUMBER OF INDEPENDENT PARAMETERS : 4

FINAL VALUES : (STANDARD DEVIATIONS : 2nd LINE)

| ZERO              | LAMBDA  | A       | B       | C      | ALPHA  | BETA   | GAMMA  |
|-------------------|---------|---------|---------|--------|--------|--------|--------|
| -0.016            | 1.5406  | 7.1003  | 9.2619  | 8.9283 | 90.000 | 90.000 | 90.000 |
| 0.004             | 0.0000  | 0.0008  | 0.0009  | 0.0010 | 0.000  | 0.000  | 0.000  |
| RECIPROCAL CELL : | 0.14084 | 0.10797 | 0.11200 | 90.000 | 90.000 | 90.000 | 90.000 |
| VOLUME (A**3) :   | 587.146 |         |         |        |        |        |        |

| H | K | L | TH(OBS) | TH-ZERO | TH(CALC) | DIFF.  |
|---|---|---|---------|---------|----------|--------|
| 0 | 1 | 1 | 13.780  | 13.764  | 13.765   | -0.001 |
| 1 | 1 | 0 | 15.732  | 15.716  | 15.714   | 0.002  |
| 2 | 0 | 0 | 25.082  | 25.066  | 25.063   | 0.003  |
| 1 | 1 | 2 | 25.450  | 25.434  | 25.434   | 0.000  |
| 0 | 2 | 2 | 27.750  | 27.734  | 27.734   | 0.000  |
| 2 | 1 | 1 | 28.720  | 28.705  | 28.703   | 0.002  |
| 1 | 3 | 0 | 31.596  | 31.580  | 31.575   | 0.005  |
| 1 | 3 | 2 | 37.606  | 37.591  | 37.589   | 0.002  |
| 2 | 2 | 2 | 37.720  | 37.704  | 37.725   | -0.021 |
| 0 | 3 | 3 | 42.150  | 42.134  | 42.140   | -0.006 |
| 1 | 3 | 3 | 44.133  | 44.118  | 44.113   | 0.005  |

|   |   |   |        |        |        |        |
|---|---|---|--------|--------|--------|--------|
| 3 | 1 | 2 | 44.390 | 44.375 | 44.376 | -0.002 |
| 2 | 4 | 0 | 46.822 | 46.807 | 46.804 | 0.003  |
| 2 | 0 | 4 | 48.124 | 48.108 | 48.114 | -0.006 |
| 3 | 3 | 0 | 48.438 | 48.423 | 48.422 | 0.001  |
| 2 | 4 | 2 | 51.342 | 51.326 | 51.321 | 0.005  |
| 4 | 0 | 0 | 51.459 | 51.444 | 51.437 | 0.006  |
| 1 | 3 | 4 | 52.159 | 52.144 | 52.138 | 0.006  |
| 2 | 2 | 4 | 52.255 | 52.240 | 52.243 | -0.003 |
| 1 | 0 | 5 | 52.851 | 52.835 | 52.823 | 0.012  |
| 1 | 5 | 2 | 55.191 | 55.176 | 55.176 | 0.000  |
| 0 | 4 | 4 | 57.291 | 57.276 | 57.285 | -0.009 |
| 4 | 2 | 2 | 59.451 | 59.435 | 59.437 | -0.002 |
| 0 | 6 | 2 | 63.763 | 63.747 | 63.741 | 0.006  |
| 2 | 6 | 0 | 65.942 | 65.926 | 65.932 | -0.006 |

M(20) = 40.40  
F(20) = 48.74 ( 0.0045, 91)

Final Rp on the .prf = 6.8966284E-02

=====

THE SELECTION OF THE "BEST" CELL  
based on McM20, Rp, F(20), M(20), V, high symmetry ?  
DEPENDS ON YOU, EXCLUSIVELY.

However...

It is suggested that the correct cell could be :

=====

| IN | F.o.M. | Volume  | a      | b      | c      | alpha  | beta   | gamma  | Bravais |
|----|--------|---------|--------|--------|--------|--------|--------|--------|---------|
| 26 | 30.10  | 586.283 | 7.0958 | 9.2595 | 8.9231 | 90.000 | 90.000 | 90.000 | P Ortho |

\*\*\*

Found 3 time(s) head of the best lists

=====

## Files 2. Instructions and results files from the cell determination using the ESPOIR software.

```
! title
ZnAlF5triaz
! a, b, c, alpha, beta, gamma
8.9288 7.0989 9.2592 90.000 90.000 90.000
! space group
I M M A
! lambda, radiation, N of atoms, types of atoms, N of objects, "|Fobs|" or patterns, iprint
1.54056 4 13 5 3 1 1
0.040027 -0.016779 0.013392 5
! atom names, in 8A4
Zn Al F C N
! code for minimal distance constraints
0
! maximum moves for each type of atom
3.500 3.500 3.500 3.500 3.500
! annealing law, sigma, reject
2.0000 1.0000 0.0010
! number of events for : print, maximum, save
20000 200000 100000
! events for restart, rmax, ichi, number of runs
40000 0.200 2 10
! object type and NPERM for object 1
1 0
! number of atoms of each type in object 1
1 0 0 0 0
! B overall, NOCC, NSPE for object 1
1.0 0 0
! object type and NPERM for object 2
2 4
! number of atoms of each type in object 2
0 1 6 0 0
```

```

! B overall, NOCC, NSPE for object  2
1.0 0 0
! cell parameters, and x, y, z, occup. for object  2
10 10 10 90 90 90
0 0 0 1
0.18 0 0 1
-0.18 0 0 1
0 0.18 0 1
0 -0.18 0 1
0 0 0.18 1
0 0 -0.18 1
! object type and NPERM for object  3
2 4
! number of atoms of each type in object  3
0 0 0 2 3
! B overall, NOCC, NSPE for object  3
3.0 0 0
! cell parameters, and x, y, z, occup. for object  3
9.2710 10.6220 3.7330 90.0000 94.9600 90.0000
0.76300 0.23310 0.57670 1
0.77070 0.11450 0.42790 1
0.53910 0.18040 0.40940 1
0.63460 0.08910 0.33080 1
0.62450 0.27030 0.56490 1

=====
ESPOIR VERSION 3.50      by A. Le Bail - 2000 -alb@crystal.org
=====

Using generic filename : camw28o

29-Mar-2010      18 hour  7 min 18 Sec

Cell parameters :      8.9288   7.0989   9.2592   90.000   90.000   90.000

Reciprocal cell parameters :      0.1120   0.1409   0.1080   90.000   90.000   90.000

SPACE GROUP : I M M A

BURZLAFF Crystal system :  2 Orthorhombic

Wavelength :  1.54056

X-ray data

The fit will be on the pseudo powder pattern
with U, V, W, STEPn =  0.0400 -0.0168  0.0134  5.0000

The model contains  3 objects

Overall thermal parameter B =  1.00 for object  1

Overall thermal parameter B =  1.00 for object  2

Starting rigid model cell parameters :
10.0000 10.0000 10.0000  90.000  90.000  90.000

Reciprocal cell parameters :  0.1000  0.1000  0.1000  90.000  90.000  90.000

Starting coordinates x,y,z and occupation numbers

0.0000  0.0000  0.0000  1.00
0.1800  0.0000  0.0000  1.00
-0.1800  0.0000  0.0000  1.00
0.0000  0.1800  0.0000  1.00
0.0000 -0.1800  0.0000  1.00
0.0000  0.0000  0.1800  1.00
0.0000  0.0000 -0.1800  1.00

Overall thermal parameter B =  3.00 for object  3

```

Starting rigid model cell parameters :  
 9.2710 10.6220 3.7330 90.000 94.960 90.000  
 Reciprocal cell parameters : 0.1083 0.0941 0.2689 90.000 85.040 90.000

Starting coordinates x,y,z and occupation numbers

|        |        |        |      |
|--------|--------|--------|------|
| 0.7630 | 0.2331 | 0.5767 | 1.00 |
| 0.7707 | 0.1145 | 0.4279 | 1.00 |
| 0.5391 | 0.1804 | 0.4094 | 1.00 |
| 0.6346 | 0.0891 | 0.3308 | 1.00 |
| 0.6245 | 0.2703 | 0.5649 | 1.00 |

THE STRUCT. IS CENTRIC,

AND THE EQUIV. POS. ARE:

|        | ROTATION MATRIX |     |     |     |      |     |     |     | TRANSLATION VECTOR |        |        |        |
|--------|-----------------|-----|-----|-----|------|-----|-----|-----|--------------------|--------|--------|--------|
| POS. 1 | 1.0             | 0.0 | 0.0 | 0.0 | 1.0  | 0.0 | 0.0 | 0.0 | 1.0                | 0.0000 | 0.0000 | 0.0000 |
| POS. 2 | 1.0             | 0.0 | 0.0 | 0.0 | -1.0 | 0.0 | 0.0 | 0.0 | -1.0               | 0.5000 | 0.5000 | 0.5000 |
| POS. 3 | -1.0            | 0.0 | 0.0 | 0.0 | 1.0  | 0.0 | 0.0 | 0.0 | -1.0               | 0.5000 | 0.0000 | 0.5000 |
| POS. 4 | -1.0            | 0.0 | 0.0 | 0.0 | -1.0 | 0.0 | 0.0 | 0.0 | 1.0                | 0.0000 | 0.5000 | 0.0000 |

Total number of symmetry operators = 16

Full list of symmetry operators :

|         | ROTATION MATRIX |     |     |     |      |     |     |     | TRANSLATION VECTOR |        |        |        |
|---------|-----------------|-----|-----|-----|------|-----|-----|-----|--------------------|--------|--------|--------|
| POS. 1  | 1.0             | 0.0 | 0.0 | 0.0 | 1.0  | 0.0 | 0.0 | 0.0 | 1.0                | 0.0000 | 0.0000 | 0.0000 |
| POS. 2  | 1.0             | 0.0 | 0.0 | 0.0 | -1.0 | 0.0 | 0.0 | 0.0 | -1.0               | 0.5000 | 0.5000 | 0.5000 |
| POS. 3  | -1.0            | 0.0 | 0.0 | 0.0 | 1.0  | 0.0 | 0.0 | 0.0 | -1.0               | 0.5000 | 0.0000 | 0.5000 |
| POS. 4  | -1.0            | 0.0 | 0.0 | 0.0 | -1.0 | 0.0 | 0.0 | 0.0 | 1.0                | 0.0000 | 0.5000 | 0.0000 |
| POS. 5  | 1.0             | 0.0 | 0.0 | 0.0 | 1.0  | 0.0 | 0.0 | 0.0 | 1.0                | 0.5000 | 0.5000 | 0.5000 |
| POS. 6  | 1.0             | 0.0 | 0.0 | 0.0 | -1.0 | 0.0 | 0.0 | 0.0 | -1.0               | 1.0000 | 1.0000 | 1.0000 |
| POS. 7  | -1.0            | 0.0 | 0.0 | 0.0 | 1.0  | 0.0 | 0.0 | 0.0 | -1.0               | 1.0000 | 0.5000 | 1.0000 |
| POS. 8  | -1.0            | 0.0 | 0.0 | 0.0 | -1.0 | 0.0 | 0.0 | 0.0 | 1.0                | 0.5000 | 1.0000 | 0.5000 |
| POS. 9  | -1.0            | 0.0 | 0.0 | 0.0 | -1.0 | 0.0 | 0.0 | 0.0 | -1.0               | 0.0000 | 0.0000 | 0.0000 |
| POS. 10 | -1.0            | 0.0 | 0.0 | 0.0 | 1.0  | 0.0 | 0.0 | 0.0 | 1.0                | 0.5000 | 0.5000 | 0.5000 |
| POS. 11 | 1.0             | 0.0 | 0.0 | 0.0 | -1.0 | 0.0 | 0.0 | 0.0 | 1.0                | 0.5000 | 0.0000 | 0.5000 |
| POS. 12 | 1.0             | 0.0 | 0.0 | 0.0 | 1.0  | 0.0 | 0.0 | 0.0 | -1.0               | 0.0000 | 0.5000 | 0.0000 |
| POS. 13 | -1.0            | 0.0 | 0.0 | 0.0 | -1.0 | 0.0 | 0.0 | 0.0 | -1.0               | 0.5000 | 0.5000 | 0.5000 |
| POS. 14 | -1.0            | 0.0 | 0.0 | 0.0 | 1.0  | 0.0 | 0.0 | 0.0 | 1.0                | 1.0000 | 1.0000 | 1.0000 |
| POS. 15 | 1.0             | 0.0 | 0.0 | 0.0 | -1.0 | 0.0 | 0.0 | 0.0 | 1.0                | 1.0000 | 0.5000 | 1.0000 |
| POS. 16 | 1.0             | 0.0 | 0.0 | 0.0 | 1.0  | 0.0 | 0.0 | 0.0 | -1.0               | 0.5000 | 1.0000 | 0.5000 |

Title of run :

Overall standard deviation is 1.0000

Accept a move even if - 0.001000 > DELTA R > 0.

Maximum change in any coordinate is 3.500A for particles of type 1  
 Maximum change in any coordinate is 3.500A for particles of type 2  
 Maximum change in any coordinate is 3.500A for particles of type 3  
 Maximum change in any coordinate is 3.500A for particles of type 4  
 Maximum change in any coordinate is 3.500A for particles of type 5

Move amplitudes will be progressively reduced by MOVE=MOVE\*(1.-NGEN/maxNGEN)\*\*anneal  
 with anneal = 2.00

Writing summary every 20000 generated moves  
 Programme will run for 200000.0 moves saving every 100000.0 moves

Restart after 40000 events IF the R factor is still higher than 0.200

Number of different starting configurations to test : 10

Configuration contains 13 atoms of 5 types

REAL AND IM. X-RAY SCATTER. FACT.

|    |          |          |         |          |         |          |         |          |
|----|----------|----------|---------|----------|---------|----------|---------|----------|
| zn | 14.07430 | 3.26550  | 7.03180 | 0.23330  | 5.16520 | 10.31630 | 2.41000 | 58.70970 |
|    | 1.30410  | -1.61200 | 0.67800 |          |         |          |         |          |
| al | 6.42020  | 3.03870  | 1.90020 | 0.74260  | 1.59360 | 31.54720 | 1.96460 | 85.08860 |
|    | 1.11510  | 0.20400  | 0.24600 |          |         |          |         |          |
| f  | 3.53920  | 10.28250 | 2.64120 | 4.29440  | 1.51700 | 0.26150  | 1.02430 | 26.14760 |
|    | 0.27760  | 0.06900  | 0.05300 |          |         |          |         |          |
| c  | 2.31000  | 20.84390 | 1.02000 | 10.20750 | 1.58860 | 0.56870  | 0.86500 | 51.65120 |
|    | 0.21560  | 0.01700  | 0.00900 |          |         |          |         |          |
| n  | 12.21260 | 0.00570  | 3.13220 | 9.89330  | 2.01250 | 28.99750 | 1.16630 | 0.58260  |

-11.52900 0.02900 0.01800

Object 1 can be translated by 3.500

Object 2 can be translated by 3.500

Object 3 can be translated by 3.500

Test number : 1  
29-Mar-2010 18 hour 7 min 18 Sec  
ISEED = 589470981

Starting coordinates x,y,z and occupation numbers

Zn1 0.50668 0.10407 0.19500 1.000

Starting coordinates x,y,z and occupation numbers

|     |          |          |          |       |
|-----|----------|----------|----------|-------|
| A11 | 0.00000  | 0.00000  | 0.00000  | 1.000 |
| F1  | 0.20159  | 0.00000  | 0.00000  | 1.000 |
| F2  | -0.20159 | 0.00000  | 0.00000  | 1.000 |
| F3  | 0.00000  | 0.25356  | 0.00000  | 1.000 |
| F4  | 0.00000  | -0.25356 | 0.00000  | 1.000 |
| F5  | 0.00000  | 0.00000  | 0.19440  | 1.000 |
| F6  | 0.00000  | 0.00000  | -0.19440 | 1.000 |

Molecule connectivity, up to 1.8 Angstrom  
A1 A2 Distance

Total number of non-H bonds in object 2 : 0

Terminal bonds :

Bond number A1 A2

No terminal bond found

Ring analysis

(the same ring may appear several times)

No ring found

Rotatable bonds : No A1 A2

No rotatable bond found

The following 0 groups of atoms can rotate, if you wish  
(see the manual at the nobt parameter)

End of molecule connectivity analysis

Starting coordinates x,y,z and occupation numbers

|    |         |         |         |       |
|----|---------|---------|---------|-------|
| C1 | 0.77140 | 0.34878 | 0.23164 | 1.000 |
| C2 | 0.78477 | 0.17132 | 0.17187 | 1.000 |
| N1 | 0.54496 | 0.26993 | 0.16444 | 1.000 |
| N2 | 0.64696 | 0.13332 | 0.13287 | 1.000 |
| N3 | 0.62801 | 0.40445 | 0.22690 | 1.000 |

Molecule connectivity, up to 1.8 Angstrom

| A1 | A2 | Distance |
|----|----|----------|
| C1 | C2 | 1.38113  |
| C1 | N3 | 1.34054  |
| C2 | C1 | 1.38113  |
| C2 | N2 | 1.31041  |
| N1 | N2 | 1.36213  |
| N1 | N3 | 1.34023  |
| N2 | C2 | 1.31041  |
| N2 | N1 | 1.36213  |
| N3 | C1 | 1.34054  |
| N3 | N1 | 1.34023  |

Total number of non-H bonds in object 3 : 5

Terminal bonds :

| Bond number | A1 | A2 |
|-------------|----|----|
|-------------|----|----|

No terminal bond found

Ring analysis

(the same ring may appear several times)

|                |   |   |   |   |   |    |    |    |    |    |
|----------------|---|---|---|---|---|----|----|----|----|----|
| 5 atoms ring : | 1 | 2 | 4 | 3 | 5 | C1 | C2 | N2 | N1 | N3 |
| 5 atoms ring : | 1 | 5 | 3 | 4 | 2 | C1 | N3 | N1 | N2 | C2 |
| 5 atoms ring : | 2 | 4 | 3 | 5 | 1 | C2 | N2 | N1 | N3 | C1 |
| 5 atoms ring : | 3 | 4 | 2 | 1 | 5 | N1 | N2 | C2 | C1 | N3 |
| 5 atoms ring : | 3 | 5 | 1 | 2 | 4 | N1 | N3 | C1 | C2 | N2 |

Rotatable bonds : No A1 A2

No rotatable bond found

The following 0 groups of atoms can rotate, if you wish  
(see the manual at the nobt parameter)

End of molecule connectivity analysis

Starting R value = 0.788

Test number : 9

29-Mar-2010 18 hour 9 min 14 Sec

ISEED = 792486605

Starting coordinates x,y,z and occupation numbers

|     |          |          |          |       |
|-----|----------|----------|----------|-------|
| Zn1 | 0.27802  | 0.78393  | 0.97998  | 1.000 |
| All | 0.00000  | 0.00000  | 0.00000  | 1.000 |
| F1  | 0.20159  | 0.00000  | 0.00000  | 1.000 |
| F2  | -0.20159 | 0.00000  | 0.00000  | 1.000 |
| F3  | 0.00000  | 0.25356  | 0.00000  | 1.000 |
| F4  | 0.00000  | -0.25356 | 0.00000  | 1.000 |
| F5  | 0.00000  | 0.00000  | 0.19440  | 1.000 |
| F6  | 0.00000  | 0.00000  | -0.19440 | 1.000 |
| C1  | 0.77140  | 0.34878  | 0.23164  | 1.000 |
| C2  | 0.78477  | 0.17132  | 0.17187  | 1.000 |
| N1  | 0.54496  | 0.26993  | 0.16444  | 1.000 |
| N2  | 0.64696  | 0.13332  | 0.13287  | 1.000 |
| N3  | 0.62801  | 0.40445  | 0.22690  | 1.000 |

Object number 1 at test 9. Previous minimum R=0.159 at test 1

0 moves acc. 0 tested; Chi\*\*2=0.812 , R=0.812

0 perm. acc. 0 tested

0 events did not improve the fit, DAMP = 1.000000

Object number 2 at test 9. Previous minimum R=0.159 at test 1

0 rot. acc. 0 gen. and 0 tested; Chi\*\*2=0.812 , R=0.812

0 trans. acc. 0 tested

0 events did not improve the fit, DAMP = 1.000000  
Object number 3 at test 9. Previous minimum R=0.159 at test 1  
0 rot. acc. 0 gen. and 0 tested; Chi\*\*2=0.812 , R=0.812  
0 trans. acc. 0 tested  
0 events did not improve the fit, DAMP = 1.000000

Object number 1 at test 9. Previous minimum R=0.159 at test 1  
7 moves acc. 20362 tested; Chi\*\*2=0.210 , R=0.210  
0 perm. acc. 0 tested  
1 events did not improve the fit, DAMP = 0.482427

Object number 2 at test 9. Previous minimum R=0.159 at test 1  
12 rot. acc. 15185 gen. and 15185 tested; Chi\*\*2=0.210 , R=0.210  
0 trans. acc. 5061 tested  
0 events did not improve the fit, DAMP = 0.484848

Object number 3 at test 9. Previous minimum R=0.159 at test 1  
13 rot. acc. 15236 gen. and 15236 tested; Chi\*\*2=0.210 , R=0.210  
3 trans. acc. 5078 tested  
0 events did not improve the fit, DAMP = 0.483428

Object number 1 at test 9. Previous minimum R=0.159 at test 1  
7 moves acc. 32081 tested; Chi\*\*2=0.200 , R=0.200  
0 perm. acc. 0 tested  
1 events did not improve the fit, DAMP = 0.269138

Object number 2 at test 9. Previous minimum R=0.159 at test 1  
13 rot. acc. 23973 gen. and 23973 tested; Chi\*\*2=0.200 , R=0.200  
0 trans. acc. 7990 tested  
0 events did not improve the fit, DAMP = 0.270977

Object number 3 at test 9. Previous minimum R=0.159 at test 1  
13 rot. acc. 24163 gen. and 24163 tested; Chi\*\*2=0.200 , R=0.200  
3 trans. acc. 8054 tested  
0 events did not improve the fit, DAMP = 0.267041

Object number 1 at test 9. Previous minimum R=0.159 at test 1  
7 moves acc. 40841 tested; Chi\*\*2=0.196 , R=0.196  
0 perm. acc. 0 tested  
1 events did not improve the fit, DAMP = 0.150067

Object number 2 at test 9. Previous minimum R=0.159 at test 1  
13 rot. acc. 30718 gen. and 30718 tested; Chi\*\*2=0.196 , R=0.196  
0 trans. acc. 10239 tested  
0 events did not improve the fit, DAMP = 0.148734

Object number 3 at test 9. Previous minimum R=0.159 at test 1  
14 rot. acc. 30911 gen. and 30911 tested; Chi\*\*2=0.196 , R=0.196  
4 trans. acc. 10303 tested  
0 events did not improve the fit, DAMP = 0.145764

Object number 1 at test 9. Previous minimum R=0.159 at test 1  
7 moves acc. 40873 tested; Chi\*\*2=0.195 , R=0.195  
0 perm. acc. 0 tested  
1 events did not improve the fit, DAMP = 0.149695

Object number 2 at test 9. Previous minimum R=0.159 at test 1  
13 rot. acc. 30748 gen. and 30748 tested; Chi\*\*2=0.195 , R=0.195  
1 trans. acc. 10249 tested  
0 events did not improve the fit, DAMP = 0.148271

Object number 3 at test 9. Previous minimum R=0.159 at test 1  
14 rot. acc. 30945 gen. and 30945 tested; Chi\*\*2=0.195 , R=0.195  
4 trans. acc. 10314 tested  
0 events did not improve the fit, DAMP = 0.145249

Object number 1 at test 9. Previous minimum R=0.159 at test 1  
8 moves acc. 54958 tested; Chi\*\*2=0.175 , R=0.175  
0 perm. acc. 0 tested  
1 events did not improve the fit, DAMP = 0.030846

Object number 2 at test 9. Previous minimum R=0.159 at test 1  
13 rot. acc. 41298 gen. and 41298 tested; Chi\*\*2=0.175 , R=0.175  
2 trans. acc. 13765 tested  
0 events did not improve the fit, DAMP = 0.030295

Object number 3 at test 9. Previous minimum R=0.159 at test 1  
15 rot. acc. 41593 gen. and 41593 tested; Chi\*\*2=0.175 , R=0.175  
6 trans. acc. 13864 tested  
0 events did not improve the fit, DAMP = 0.028278

Object number 1 at test 9. Previous minimum R=0.158 at test 9  
13 moves acc. 62648 tested; Chi\*\*2=0.158 , R=0.158  
0 perm. acc. 0 tested  
1 events did not improve the fit, DAMP = 0.009997

Object number 2 at test 9. Previous minimum R=0.158 at test 9  
15 rot. acc. 47230 gen. and 47230 tested; Chi\*\*2=0.158 , R=0.158

9 trans. acc. 15743 tested  
 0 events did not improve the fit, DAMP = 0.009994  
 Object number 3 at test 9. Previous minimum R=0.158 at test 9  
 16 rot. acc. 47359 gen. and 47359 tested; Chi\*\*2=0.158 , R=0.158  
 11 trans. acc. 15786 tested  
 1 events did not improve the fit, DAMP = 0.009994  
  
 Object number 1 at test 9. Previous minimum R=0.158 at test 9  
 13 moves acc. 64299 tested; Chi\*\*2=0.158 , R=0.158  
 0 perm. acc. 0 tested  
 1 events did not improve the fit, DAMP = 0.009997  
 Object number 2 at test 9. Previous minimum R=0.158 at test 9  
 15 rot. acc. 48529 gen. and 48529 tested; Chi\*\*2=0.158 , R=0.158  
 9 trans. acc. 16176 tested  
 0 events did not improve the fit, DAMP = 0.009994  
 Object number 3 at test 9. Previous minimum R=0.158 at test 9  
 16 rot. acc. 48577 gen. and 48577 tested; Chi\*\*2=0.158 , R=0.158  
 12 trans. acc. 16192 tested  
 1 events did not improve the fit, DAMP = 0.009994  
  
 Object number 1 at test 9. Previous minimum R=0.158 at test 9  
 13 moves acc. 66395 tested; Chi\*\*2=0.195 , R=0.158  
 0 perm. acc. 0 tested  
 1 events did not improve the fit, DAMP = 0.009997  
 Object number 2 at test 9. Previous minimum R=0.158 at test 9  
 15 rot. acc. 50079 gen. and 50079 tested; Chi\*\*2=0.195 , R=0.158  
 9 trans. acc. 16692 tested  
 0 events did not improve the fit, DAMP = 0.009994  
 Object number 3 at test 9. Previous minimum R=0.158 at test 9  
 16 rot. acc. 50125 gen. and 50125 tested; Chi\*\*2=0.195 , R=0.158  
 12 trans. acc. 16708 tested  
 1 events did not improve the fit, DAMP = 0.009994

Final coordinates x,y,z and occupation numbers

|     |          |          |          |       |
|-----|----------|----------|----------|-------|
| Zn1 | 0.24855  | 0.27173  | 0.75015  | 1.000 |
| Al1 | 0.00245  | 0.02667  | 0.98425  | 1.000 |
| F1  | 0.04112  | 0.26667  | 1.03468  | 1.000 |
| F2  | -0.03623 | -0.21333 | 0.93382  | 1.000 |
| F3  | 0.15353  | -0.05243 | 1.09777  | 1.000 |
| F4  | -0.14864 | 0.10577  | 0.87073  | 1.000 |
| F5  | 0.13019  | 0.04756  | 0.83471  | 1.000 |
| F6  | -0.12529 | 0.00578  | 1.13379  | 1.000 |
| C1  | 0.40110  | 0.27150  | 0.07666  | 1.000 |
| C2  | 0.40308  | 0.26583  | -0.07242 | 1.000 |
| N1  | 0.63573  | 0.22757  | 0.01732  | 1.000 |
| N2  | 0.54511  | 0.23762  | -0.10077 | 1.000 |
| N3  | 0.54043  | 0.24951  | 0.12788  | 1.000 |

29-Mar-2010 18 hour 9 min 36 Sec

End of this test

Test number : 10  
 29-Mar-2010 18 hour 9 min 36 Sec  
 ISEED = 871129947

Starting coordinates x,y,z and occupation numbers

|     |          |          |          |       |
|-----|----------|----------|----------|-------|
| Zn1 | 0.97147  | 0.38258  | 0.57480  | 1.000 |
| Al1 | 0.00000  | 0.00000  | 0.00000  | 1.000 |
| F1  | 0.20159  | 0.00000  | 0.00000  | 1.000 |
| F2  | -0.20159 | 0.00000  | 0.00000  | 1.000 |
| F3  | 0.00000  | 0.25356  | 0.00000  | 1.000 |
| F4  | 0.00000  | -0.25356 | 0.00000  | 1.000 |
| F5  | 0.00000  | 0.00000  | 0.19440  | 1.000 |
| F6  | 0.00000  | 0.00000  | -0.19440 | 1.000 |
| C1  | 0.77140  | 0.34878  | 0.23164  | 1.000 |
| C2  | 0.78477  | 0.17132  | 0.17187  | 1.000 |
| N1  | 0.54496  | 0.26993  | 0.16444  | 1.000 |
| N2  | 0.64696  | 0.13332  | 0.13287  | 1.000 |



N3 0.62801 0.40445 0.22690 1.000

Object number 1 at test 10. Previous minimum R=0.158 at test 9  
0 moves acc. 0 tested; Chi\*\*2=0.796 , R=0.796  
0 perm. acc. 0 tested  
0 events did not improve the fit, DAMP = 1.000000  
Object number 2 at test 10. Previous minimum R=0.158 at test 9  
0 rot. acc. 0 gen. and 0 tested; Chi\*\*2=0.796 , R=0.796  
0 trans. acc. 0 tested  
0 events did not improve the fit, DAMP = 1.000000  
Object number 3 at test 10. Previous minimum R=0.158 at test 9  
0 rot. acc. 0 gen. and 0 tested; Chi\*\*2=0.796 , R=0.796  
0 trans. acc. 0 tested  
0 events did not improve the fit, DAMP = 1.000000  
  
Object number 1 at test 10. Previous minimum R=0.158 at test 9  
4 moves acc. 35445 tested; Chi\*\*2=0.245 , R=0.245  
0 perm. acc. 0 tested  
0 events did not improve the fit, DAMP = 0.219328  
Object number 2 at test 10. Previous minimum R=0.158 at test 9  
9 rot. acc. 26806 gen. and 26806 tested; Chi\*\*2=0.245 , R=0.245  
0 trans. acc. 8935 tested  
0 events did not improve the fit, DAMP = 0.215203  
Object number 3 at test 10. Previous minimum R=0.158 at test 9  
4 rot. acc. 26911 gen. and 26911 tested; Chi\*\*2=0.245 , R=0.245  
1 trans. acc. 8969 tested  
0 events did not improve the fit, DAMP = 0.213259

Final coordinates x,y,z and occupation numbers

|     |          |          |          |       |
|-----|----------|----------|----------|-------|
| Zn1 | 0.24353  | 0.77392  | 0.75674  | 1.000 |
| All | 0.00000  | 0.00000  | 0.00000  | 1.000 |
| F1  | -0.04884 | 0.22568  | -0.07506 | 1.000 |
| F2  | 0.04884  | -0.22568 | 0.07506  | 1.000 |
| F3  | 0.12572  | 0.11353  | 0.12457  | 1.000 |
| F4  | -0.12572 | -0.11353 | -0.12457 | 1.000 |
| F5  | 0.14983  | -0.02170 | -0.12899 | 1.000 |
| F6  | -0.14983 | 0.02170  | 0.12899  | 1.000 |
| C1  | 0.53070  | 0.60816  | 0.85278  | 1.000 |
| C2  | 0.38247  | 0.55272  | 0.85605  | 1.000 |
| N1  | 0.41705  | 0.81353  | 0.99078  | 1.000 |
| N2  | 0.32081  | 0.68121  | 0.93845  | 1.000 |
| N3  | 0.54910  | 0.76271  | 0.93405  | 1.000 |

29-Mar-2010 18 hour 9 min 49 Sec

| h | k | l | Fcalc   | Fobs    | d(A)  | 2-theta | FWHM  |
|---|---|---|---------|---------|-------|---------|-------|
| 1 | 0 | 1 | 76.236  | 47.959  | 6.427 | 13.766  | 0.109 |
| 0 | 1 | 1 | 98.309  | 103.747 | 5.634 | 15.717  | 0.109 |
| 0 | 0 | 2 | 30.992  | 13.251  | 4.630 | 19.155  | 0.108 |
| 2 | 0 | 0 | 23.091  | 4.642   | 4.464 | 19.871  | 0.108 |
| 1 | 1 | 2 | 6.358   | 10.147  | 3.557 | 25.014  | 0.108 |
| 0 | 2 | 0 | 109.194 | 83.499  | 3.549 | 25.067  | 0.108 |
| 2 | 1 | 1 | 109.940 | 110.114 | 3.499 | 25.435  | 0.108 |
| 2 | 0 | 2 | 164.497 | 153.918 | 3.214 | 27.737  | 0.108 |
| 1 | 2 | 1 | 76.547  | 112.776 | 3.107 | 28.707  | 0.108 |
| 1 | 0 | 3 | 16.324  | 22.933  | 2.917 | 30.622  | 0.109 |
| 3 | 0 | 1 | 14.308  | 19.626  | 2.833 | 31.549  | 0.109 |
| 0 | 1 | 3 | 102.432 | 84.601  | 2.830 | 31.583  | 0.109 |
| 0 | 2 | 2 | 32.838  | 53.741  | 2.817 | 31.740  | 0.109 |
| 2 | 2 | 0 | 25.997  | 40.714  | 2.778 | 32.192  | 0.109 |
| 2 | 1 | 3 | 46.030  | 61.833  | 2.390 | 37.595  | 0.111 |
| 2 | 2 | 2 | 82.329  | 63.550  | 2.382 | 37.730  | 0.111 |
| 3 | 1 | 2 | 44.192  | 32.510  | 2.361 | 38.082  | 0.111 |
| 0 | 0 | 4 | 25.652  | 0.000   | 2.315 | 38.873  | 0.112 |
| 0 | 3 | 1 | 14.679  | 8.242   | 2.293 | 39.265  | 0.112 |
| 1 | 2 | 3 | 27.828  | 21.216  | 2.254 | 39.973  | 0.112 |
| 4 | 0 | 0 | 36.594  | 26.315  | 2.232 | 40.373  | 0.112 |
| 3 | 2 | 1 | 36.003  | 35.907  | 2.214 | 40.711  | 0.113 |
| 3 | 0 | 3 | 116.874 | 117.741 | 2.142 | 42.144  | 0.113 |
| 1 | 1 | 4 | 40.449  | 26.173  | 2.137 | 42.260  | 0.114 |
| 4 | 1 | 1 | 49.901  | 34.962  | 2.075 | 43.576  | 0.114 |
| 2 | 0 | 4 | 44.492  | 39.829  | 2.055 | 44.028  | 0.115 |
| 1 | 3 | 2 | 48.471  | 51.161  | 2.051 | 44.125  | 0.115 |
| 2 | 3 | 1 | 70.173  | 67.525  | 2.039 | 44.382  | 0.115 |
| 4 | 0 | 2 | 34.870  | 40.549  | 2.011 | 45.051  | 0.115 |
| 0 | 2 | 4 | 82.091  | 79.764  | 1.939 | 46.816  | 0.117 |

|   |   |   |         |         |       |        |       |
|---|---|---|---------|---------|-------|--------|-------|
| 4 | 2 | 0 | 97.601  | 98.595  | 1.890 | 48.114 | 0.118 |
| 0 | 3 | 3 | 118.509 | 110.122 | 1.878 | 48.433 | 0.118 |
| 3 | 2 | 3 | 24.636  | 42.499  | 1.834 | 49.664 | 0.119 |
| 1 | 0 | 5 | 25.889  | 24.523  | 1.813 | 50.277 | 0.120 |
| 0 | 1 | 5 | 26.964  | 27.328  | 1.792 | 50.919 | 0.120 |
| 2 | 2 | 4 | 103.648 | 112.064 | 1.778 | 51.332 | 0.121 |
| 0 | 4 | 0 | 160.686 | 174.812 | 1.775 | 51.447 | 0.121 |
| 3 | 1 | 4 | 28.623  | 28.903  | 1.770 | 51.609 | 0.121 |
| 5 | 0 | 1 | 40.953  | 62.200  | 1.753 | 52.118 | 0.121 |
| 4 | 1 | 3 | 85.856  | 88.711  | 1.753 | 52.141 | 0.122 |
| 4 | 2 | 2 | 94.297  | 94.890  | 1.749 | 52.245 | 0.122 |
| 2 | 3 | 3 | 46.067  | 58.181  | 1.731 | 52.846 | 0.122 |
| 3 | 3 | 2 | 20.377  | 35.405  | 1.720 | 53.220 | 0.123 |
| 1 | 4 | 1 | 24.111  | 23.091  | 1.711 | 53.522 | 0.123 |
| 2 | 1 | 5 | 77.465  | 60.318  | 1.663 | 55.189 | 0.125 |
| 0 | 4 | 2 | 1.639   | 3.390   | 1.657 | 55.398 | 0.125 |
| 2 | 4 | 0 | 9.898   | 10.987  | 1.649 | 55.688 | 0.125 |
| 1 | 3 | 4 | 29.282  | 15.539  | 1.627 | 56.515 | 0.126 |
| 5 | 1 | 2 | 7.698   | 7.927   | 1.622 | 56.704 | 0.126 |
| 1 | 2 | 5 | 4.677   | 7.049   | 1.615 | 56.983 | 0.127 |
| 4 | 0 | 4 | 126.443 | 127.813 | 1.607 | 57.290 | 0.127 |
| 4 | 3 | 1 | 74.722  | 72.219  | 1.599 | 57.583 | 0.128 |
| 3 | 0 | 5 | 59.182  | 48.424  | 1.572 | 58.668 | 0.129 |
| 5 | 2 | 1 | 7.551   | 23.728  | 1.572 | 58.678 | 0.129 |
| 2 | 4 | 2 | 90.950  | 90.616  | 1.554 | 59.447 | 0.130 |
| 5 | 0 | 3 | 55.571  | 59.875  | 1.546 | 59.781 | 0.130 |
| 0 | 0 | 6 | 48.231  | 39.979  | 1.543 | 59.887 | 0.130 |
| 1 | 4 | 3 | 27.895  | 21.388  | 1.516 | 61.067 | 0.132 |
| 3 | 4 | 1 | 32.392  | 25.266  | 1.504 | 61.612 | 0.133 |
| 6 | 0 | 0 | 9.680   | 17.489  | 1.488 | 62.345 | 0.134 |
| 1 | 1 | 6 | 27.386  | 16.491  | 1.487 | 62.401 | 0.134 |
| 4 | 2 | 4 | 2.503   | 19.454  | 1.464 | 63.500 | 0.135 |
| 2 | 0 | 6 | 64.600  | 65.785  | 1.459 | 63.758 | 0.136 |
| 0 | 3 | 5 | 45.795  | 62.260  | 1.458 | 63.766 | 0.136 |
| 3 | 3 | 4 | 27.152  | 29.158  | 1.446 | 64.364 | 0.137 |
| 6 | 1 | 1 | 49.722  | 67.075  | 1.439 | 64.738 | 0.137 |
| 3 | 2 | 5 | 23.380  | 45.004  | 1.438 | 64.798 | 0.137 |
| 4 | 3 | 3 | 48.409  | 33.140  | 1.437 | 64.828 | 0.137 |
| 5 | 2 | 3 | 25.242  | 26.645  | 1.417 | 65.851 | 0.139 |
| 6 | 0 | 2 | 80.428  | 60.625  | 1.417 | 65.872 | 0.139 |
| 0 | 2 | 6 | 95.456  | 105.997 | 1.415 | 65.951 | 0.139 |
| 0 | 4 | 4 | 55.736  | 38.892  | 1.408 | 66.311 | 0.140 |
| 0 | 5 | 1 | 54.393  | 77.634  | 1.403 | 66.580 | 0.140 |
| 4 | 1 | 5 | 57.122  | 63.258  | 1.397 | 66.905 | 0.141 |
| 4 | 4 | 0 | 59.142  | 51.919  | 1.389 | 67.351 | 0.141 |
| 5 | 1 | 4 | 6.433   | 33.012  | 1.387 | 67.488 | 0.142 |
| 2 | 3 | 5 | 72.027  | 49.706  | 1.386 | 67.511 | 0.142 |
| 6 | 2 | 0 | 92.202  | 93.098  | 1.372 | 68.287 | 0.143 |
| 3 | 4 | 3 | 39.857  | 48.161  | 1.367 | 68.611 | 0.143 |
| 5 | 3 | 2 | 2.777   | 16.371  | 1.362 | 68.864 | 0.144 |
| 2 | 2 | 6 | 17.960  | 16.394  | 1.349 | 69.636 | 0.145 |
| 3 | 1 | 6 | 8.360   | 12.502  | 1.345 | 69.867 | 0.146 |
| 2 | 4 | 4 | 35.908  | 30.050  | 1.343 | 69.987 | 0.146 |
| 1 | 5 | 2 | 7.854   | 16.214  | 1.342 | 70.058 | 0.146 |
| 2 | 5 | 1 | 47.056  | 56.613  | 1.339 | 70.249 | 0.146 |
| 4 | 4 | 2 | 24.429  | 25.633  | 1.331 | 70.748 | 0.147 |
| 6 | 1 | 3 | 55.542  | 27.020  | 1.317 | 71.577 | 0.149 |
| 6 | 2 | 2 | 26.161  | 21.523  | 1.316 | 71.664 | 0.149 |
| 1 | 0 | 7 | 24.115  | 39.087  | 1.308 | 72.128 | 0.150 |
| 0 | 1 | 7 | 73.667  | 69.002  | 1.300 | 72.649 | 0.151 |

Final RF factor = 0.2007589  
Final Rp(F) factor = 0.1581771

End of this test

## References.

---

- i M. Feike, D. E. Demco, R. Graf, J. Gottwald, S. Hafner, H. W. Spiess, *J. Magn. Reson.*, 1996, **122**, 214.
- ii D. States, R. Haberkorn, D. Ruben, *J. Magn. Reson.*, 1982, **48**, 286.
- iii B. M. Fung, A. K. Khitrin, K. Ermolaev, *J. Magn. Reson.*, 2000, **142**, 97.
- iv D. Massiot, F. Fayon, M. Capron, I. King, S. Le Calvé, B. Alonso, J. O. Durand, B. Bujoli, Z. Gan, G. Hoatson, *Magn. Reson. Chem.*, 2002, **40**, 70.
- v W. Kohn, L. Sham, *J. Phys. Rev.*, 1965, **140**, 1133.
- vi M. D. Segall, P. L. D. Lindan, M. J. Probert, C. J. Pickard, P. J. Hasnip, S. J. Clark, M. C. Payne, *J. Phys.: Condens. Matter*, 2002, **14**, 2717.
- vii S. J. Clark, M. D. Segall, C. J. Pickard, P. J. Hasnip, M. J. Probert, K. Refson, M. C. Payne, *Z. Kristallogr.*, 2005, **220**, 567.
- viii H. J. Monkhorst, J. D. Pack, *Phys. Rev. B*, 1976, **13**, 5188.
- ix J. P. Perdew, K. Burke, M. Ernzerhof, *Phys. Rev. Lett.*, 1996, **77**, 3865.
- x C. J. Pickard, F. Mauri, *Phys. Rev. B*, 2001, **63**, 245101.
